# Supplementary material for: One-pot synthesis of CuInS2 nanocrystals using different anions to engineer their morphology and crystal phase
Source: Royal Society of Chemistry journal article supplement (doi:10.1039/c5dt01111f), 2015-01-01
Supplement: c5dt01111f1.pdf [file c5dt01111f1.pdf]

## Electronic Supplementary Information

### One-pot Synthesis of CuInS<sub>2</sub> Nanocrystals Using Different Anions to Engineer Morphology and Crystal Phase

Aiwei Tang,<sup>\*a,b</sup> Zunlan Hu,<sup>a</sup> Zhe Yin,<sup>a</sup> Haihang Ye,<sup>a</sup> Chunhe Yang,<sup>a</sup> and Feng Teng<sup>\*b</sup>

*<sup>a</sup>Department of Chemistry, School of Science, Beijing JiaoTong University, Beijing 100044, P. R. China*

*E-mail: [awtang@bjtu.edu.cn](mailto:awtang@bjtu.edu.cn); Tel: +86-10-51683627*

*<sup>b</sup>Key Laboratory of Luminescence and Optical Information, Ministry of Education, Beijing JiaoTong University, Beijing 100044, P. R. China*

*Email: [fteng@bjtu.edu.cn](mailto:fteng@bjtu.edu.cn)*

**Fig. S1**

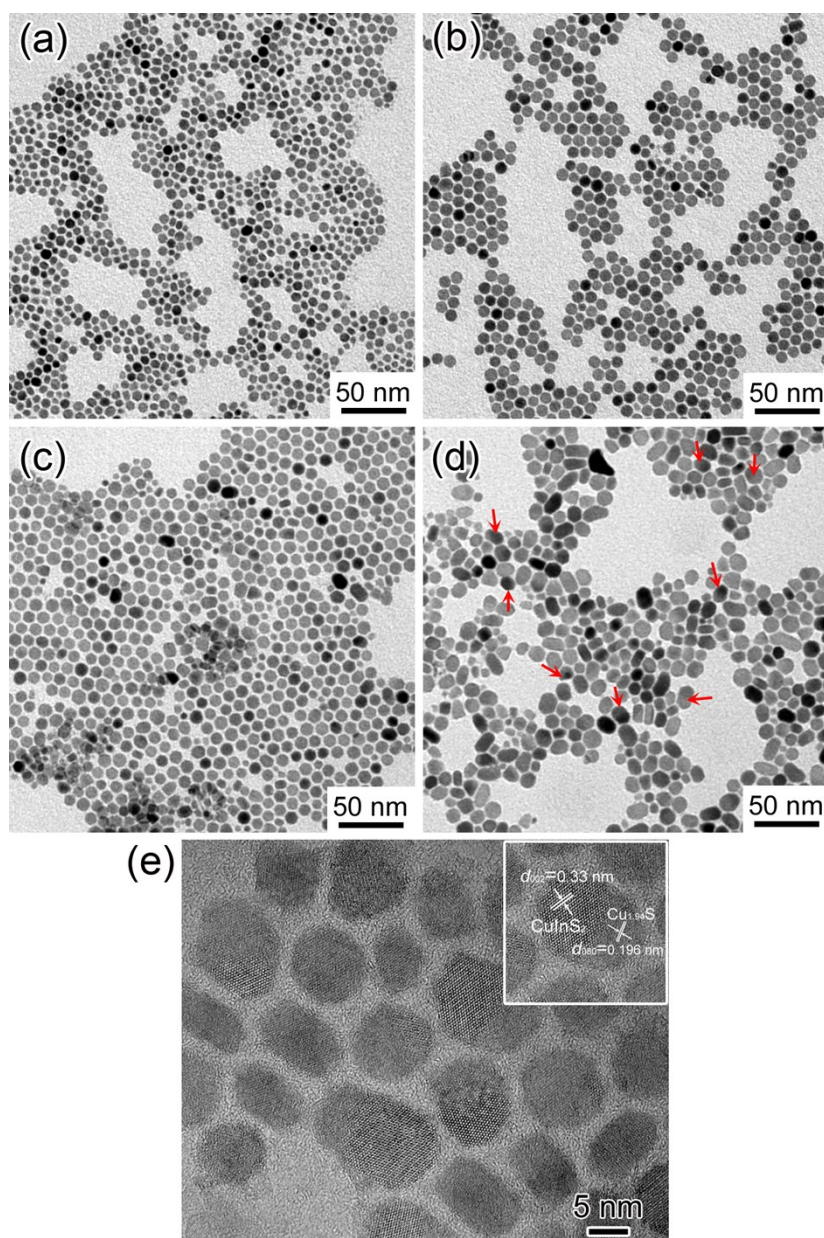

**Fig. S1** TEM images of Sample A for different reaction time: (a) 0 min; (b) 10 min; (c) 30 min; (d) 60 min, and the heterostructured nanocrystals are labeled by the red arrows , and (e) the corresponding HRTEM image of Sample A obtained at 60 min, and the inset shows the enlarged image of the  $\text{Cu}_{1.94}\text{S}$ - $\text{CuInS}_2$  heterostructured nanocrystals.

**Fig. S2**

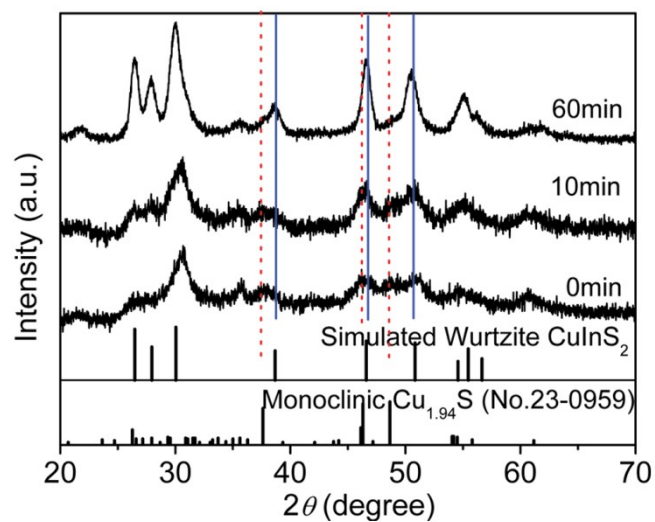

**Fig. S2** XRD patterns of Sample A obtained at different reaction time, and the bottom lines are the simulated wurtzite  $\text{CuInS}_2$  and the standard lines of monoclinic  $\text{Cu}_{1.94}\text{S}$  (JCPDS No. 23-0959). The solid and dashed vertical lines represent the main diffraction peaks of wurtzite  $\text{CuInS}_2$  and monoclinic  $\text{Cu}_{1.94}\text{S}$ .

**Fig.S3**

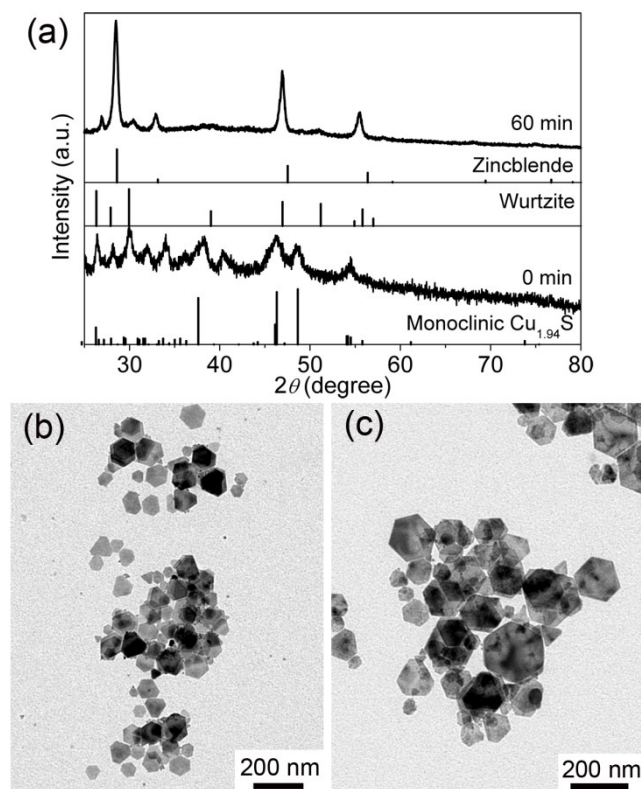

**Fig.S3** (a) XRD patterns of Sample B obtained at 0 min and 60 min, and the bottom lines represent the standard diffraction peaks of monoclinic  $\text{Cu}_{1.94}\text{S}$  and the simulated diffraction lines of zincblende and wurtzite  $\text{CuInS}_2$ ; TEM images of Sample B obtained at (b) 0 min and (c) 10 min.

**Fig.S4**

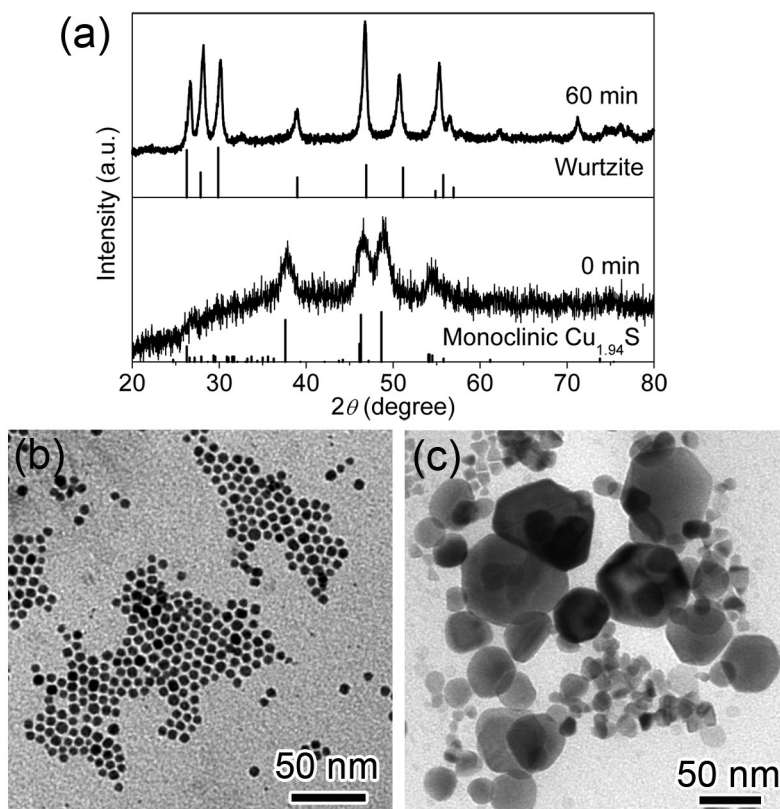

**Fig.S4** (a) XRD patterns of the products synthesized by using hot-injection method, in which 2.5 mmol of  $\text{Cu}(\text{acac})_2$  was mixed with ODE and DDT and was heated to 240 °C, and the aliquot was extracted, and then 2.5 mmol of  $\text{InCl}_3$  in ODE was quickly injected into the hot mixture, and kept for 60 min at 240 °C; TEM images of the products obtained at (b) 0 min and (c) 60 min.

**Fig. S5**

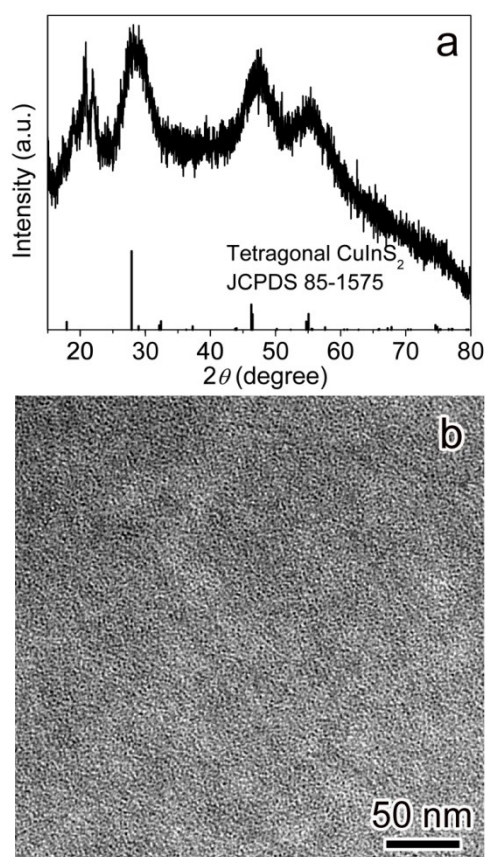

**Fig. S5** (a) XRD pattern and (b) TEM images of Sample C obtained at the initial stage (0 min), and the bottom lines of (a) represent the standard diffraction peaks of tetragonal chalcopyrite  $\text{CuInS}_2$  phase (JCPDS No. 85-1575).



**Fig. S6**

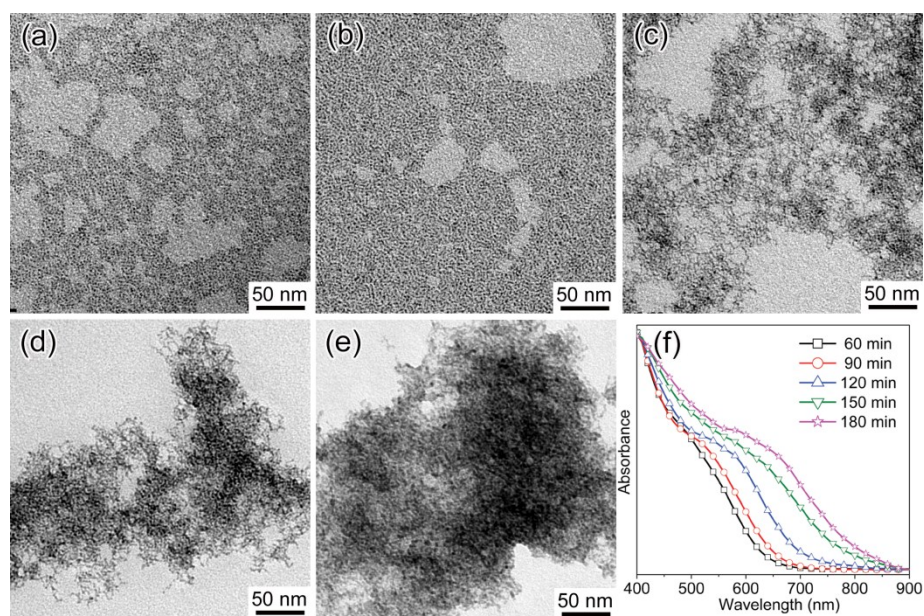

**Fig. S6** TEM images of Sample C obtained at different reaction time: (a) 60 min; (b) 90 min; (c) 120 min; (d) 150 min; (e) 180 min; (f) the corresponding UV-Vis absorption spectra measured in chloroform.

**Fig.S7**

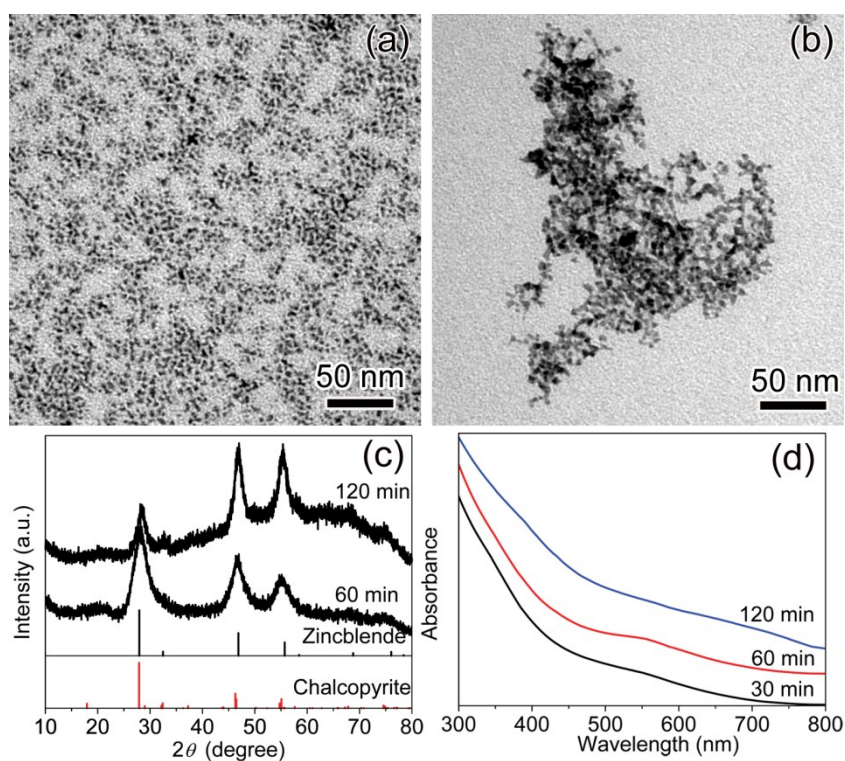

**Fig. S7** TEM images of Sample D obtained at (a) 30 min and (b) 120 min; (c) XRD patterns of Sample D obtained at different reaction time, and the bottom lines represent the standard diffraction peaks of the tetragonal chalcopyrite  $\text{CuInS}_2$  (JCPDS No.85-1575) and stimulated zincblende  $\text{CuInS}_2$  phase, and (d) the corresponding UV-Vis absorption spectra.



**Fig. S8**

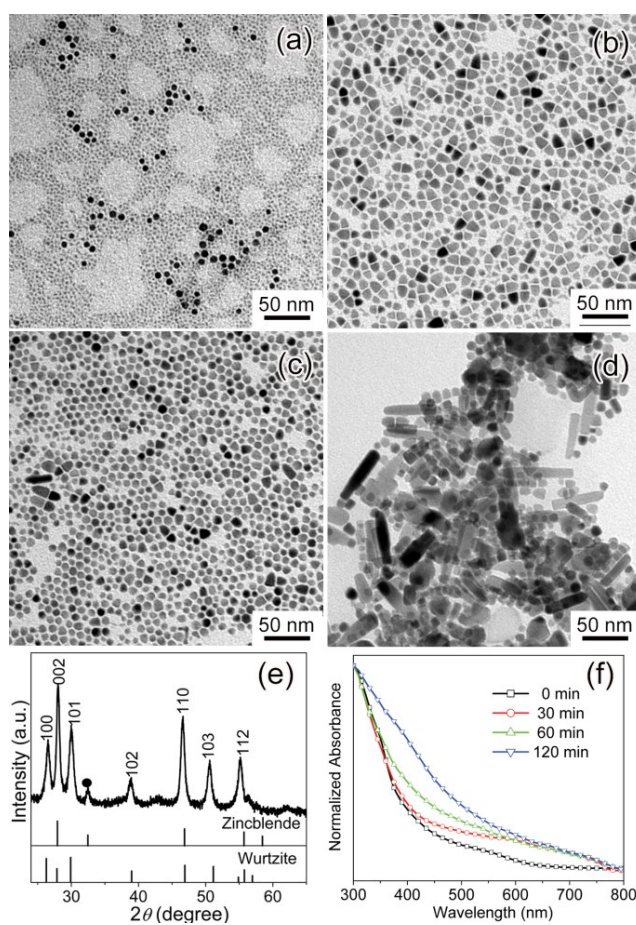

**Fig. S8** TEM images of Sample E obtained at different reaction time: (a) 0 min; (b) 60 min; (c) 60 min; (d) 120 min; (e) XRD pattern of Sample E obtained at 120 min, and the bottom lines represent the simulated zincblende and wurtzite  $\text{CuInS}_2$ ; (f) UV-Vis absorption spectra of sample E obtained at different reaction time.

**Fig. S9**

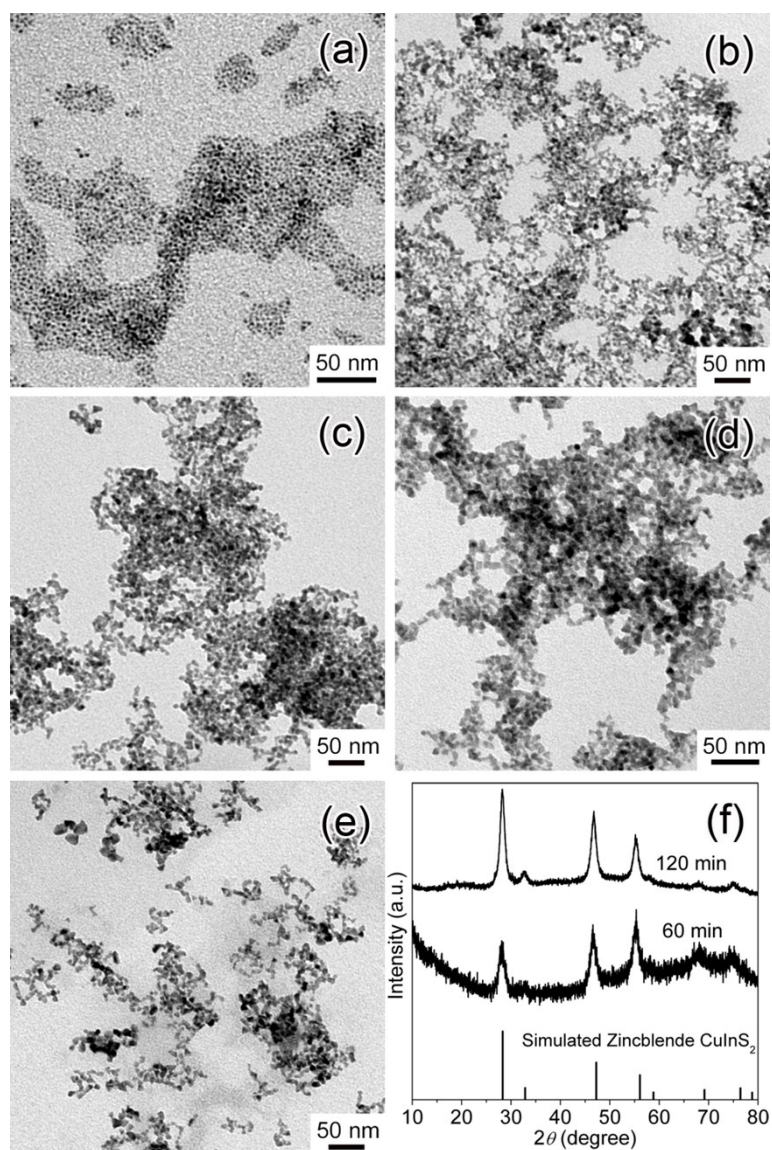

**Fig. S9** TEM images of Sample F obtained at different reaction time: (a) 0 min; (b) 30 min; (c) 60 min; (d) 90 min; (e) 120 min; (f) XRD patterns of Sample F obtained at 60 min and 120 min, and the bottom lines represent simulated zincblende CuInS<sub>2</sub> phase.

**Fig. S10**

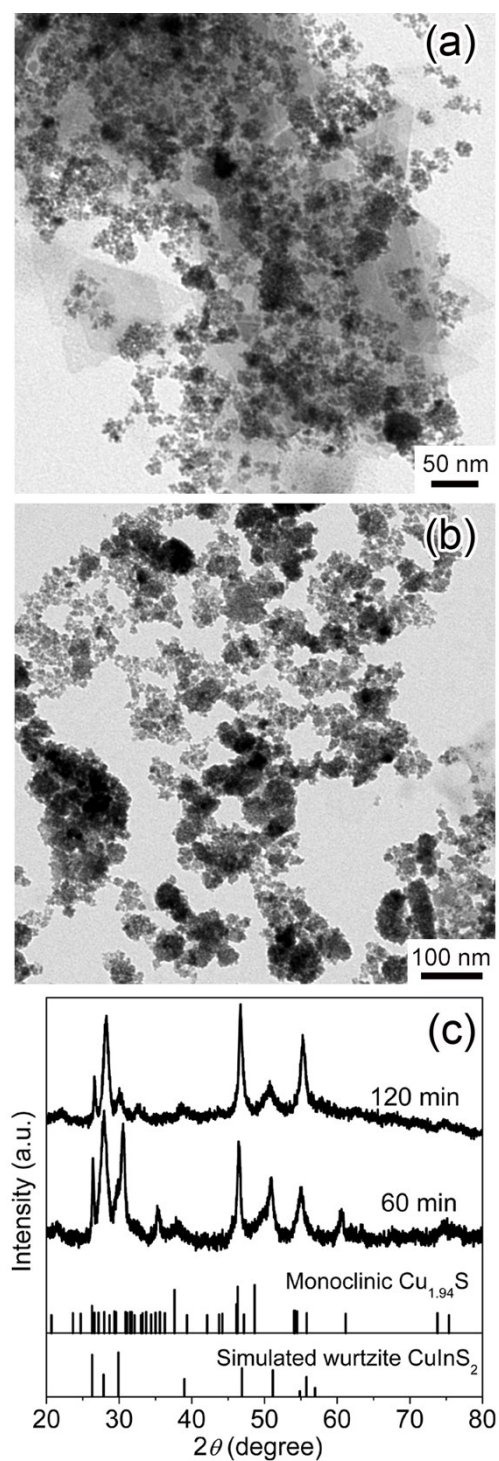

**Fig. S10** TEM images of Sample H obtained at different reaction time: (a) 0 min; (b) 30 min; (c) XRD patterns of the products obtained at 60 min and 120 min, and the vertical lines represent the standard diffraction peaks of monoclinic  $\text{Cu}_{1.94}\text{S}$  and the simulated diffraction lines of wurtzite  $\text{CuInS}_2$ .



**Fig. S11**

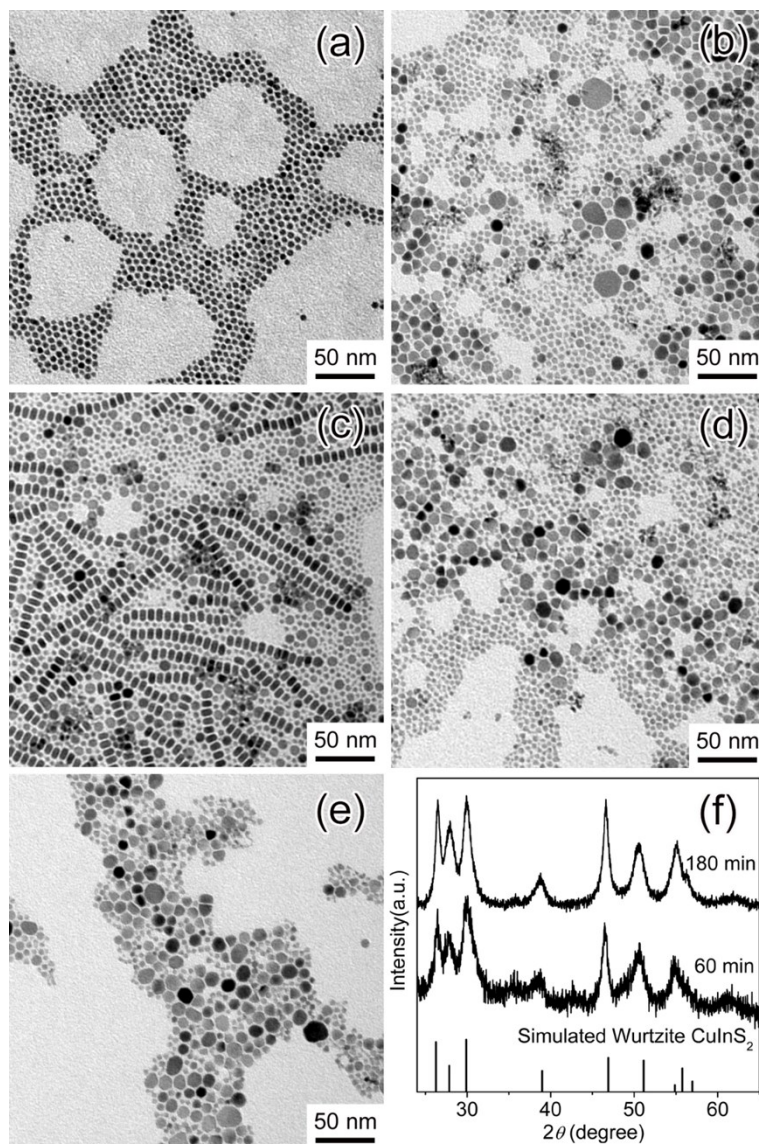

**Fig. S11** TEM images of Sample I obtained at different reaction time: (a) 0 min; (b) 30 min; (c) 60 min; (d) 90 min; (e) 120 min; (f) the corresponding XRD pattern of the product obtained at 60 and 120 min, together with the simulated diffraction lines of wurtzite  $\text{CuInS}_2$  shown in the bottom.
